# Supplementary material for: Crosstalk of Oxidative Phosphorylation-Related Subtypes, Establishment of a Prognostic Signature and Immune Infiltration Characteristics in Colorectal Adenocarcinoma
Source: MDPI journal article supplement (doi:10.3390/cancers14184503), 2022-09-16
Supplement: s1 [file s1]

**Table S1 Clinical features of COAD patients**

| Covariates | Type      | Total       | Test        | Train       | Pvalue |
|------------|-----------|-------------|-------------|-------------|--------|
| Age        | <=65      | 175(41.97%) | 93(44.71%)  | 82(39.23%)  | 0.301  |
| Age        | >65       | 242(58.03%) | 115(55.29%) | 127(60.77%) |        |
| Gender     | FEMALE    | 193(46.28%) | 91(43.75%)  | 102(48.8%)  | 0.349  |
| Gender     | MALE      | 224(53.72%) | 117(56.25%) | 107(51.2%)  |        |
| Stage      | Stage I   | 72(17.27%)  | 37(17.79%)  | 35(16.75%)  | 0.900  |
| Stage      | Stage II  | 160(38.37%) | 79(37.98%)  | 81(38.76%)  |        |
| Stage      | Stage III | 117(28.06%) | 60(28.85%)  | 57(27.27%)  |        |
| Stage      | Stage IV  | 57(13.67%)  | 26(12.5%)   | 31(14.83%)  |        |
| Stage      | unknow    | 11(2.64%)   | 6(2.88%)    | 5(2.39%)    |        |
| T          | T1        | 9(2.16%)    | 2(0.96%)    | 7(3.35%)    | 0.349  |
| T          | T2        | 74(17.75%)  | 40(19.23%)  | 34(16.27%)  |        |
| T          | T3        | 284(68.11%) | 141(67.79%) | 143(68.42%) |        |
| T          | T4        | 49(11.75%)  | 24(11.54%)  | 25(11.96%)  |        |
| T          | unknow    | 1(0.24%)    | 1(0.48%)    | 0(0%)       |        |
| M          | M0        | 311(74.58%) | 155(74.52%) | 156(74.64%) | 0.658  |
| M          | M1        | 57(13.67%)  | 26(12.5%)   | 31(14.83%)  |        |
| M          | unknow    | 49(11.75%)  | 27(12.98%)  | 22(10.53%)  |        |
| N          | N0        | 247(59.23%) | 124(59.62%) | 123(58.85%) | 0.896  |
| N          | N1        | 98(23.5%)   | 47(22.6%)   | 51(24.4%)   |        |
| N          | N2        | 72(17.27%)  | 37(17.79%)  | 35(16.75%)  |        |

**Table S2 Primer sequence of genes in qRT-PCR**

|          | Forward sequence        | Reverse sequence       |
|----------|-------------------------|------------------------|
| β-actin  | CATGTACGTTGCTATCCAGGC   | CTCCTTAATGTCACGCACGAT  |
| PPARGC1A | TCTGAGTCTGTATGGAGTGACAT | CCAAGTCGTTACATCTAGTTCA |
| SHH      | CTCGCTGCTGGTATGCTCG     | ATCGCTCGGAGTTTCTGGAGA  |
| TRAP1    | AGGACGACTGTTCAGCACG     | CCGGGCAACAATGTCCAAAAG  |
| PPRC1    | CAAGCGCCGTATGGGACTTT    | GGAGGCATCCATGTAGCTCT   |
